# Supplementary material
Source: PubMed Central journal article supplement (PMC5503801)

## Supporting information

### Appendix A. Sample code to fit the four parameters sigmoidal model

```
*****  
Macro to fit empty model and estimate initial values for theta 1 to theta 4  
dt= dataset, t=time from death, id= participant id, y=outcome, ref_time= for example 3 years before death  
*****;  
%macro plcvdinit (dt,t, id,y,ref_time);  
proc univariate data=&dt. (where =( &t.<0.5)); var &y. ; output out=m mean= mean_death; run;  
data _null_ ; set m ;  
    call symput (compress("initial_theta1") ,mean_death);  
    call symput (compress("initial_theta4") ,-(mean_death/2));  
run;  
proc mixed data=&dt. (where=( &t.< ref_time))  
    method=reml covtest noclprint ratio maxfunc=250 maxiter=100 namelen=50;  
    class &id. ;    model &y.= &t./s outp=pred covb ddfm=bw cl;  
    random intercept &t./type=un subject=&id. g gcorr;  
    ods output SolutionF=fl;  
run; quit;  
proc mixed data=&dt. (where=(&t.> ref_time))  
    method=reml covtest noclprint ratio maxfunc=250 maxiter=100 namelen=50;  
    class &id. ;    model &y.= &t./s outp=pred covb ddfm=bw cl;  
    random intercept &t./type=un subject=&id. g gcorr;  
    ods output SolutionF=fh;  
run; quit;  
data _null_ ;  
    merge fl(where=(effect ="&t.") rename=(estimate=low)) fh (where=(effect ="&t.") rename=(estimate=high)) ;  
    by effect;  
    if 0.5<abs(low/high)<1.5 then theta3_val=1.05; else theta3_val =0.5;  
    if 0.5<abs(low/high)<1.5 then theta2_val=30; else theta2_val=2;
```

```

call symput (compress("initial_theta3"), theta3_val);

call symput (compress("initial_theta2"), theta2_val);

run;

proc nlmixed data=&dt. cov;

parms theta1 &initial_theta1 theta2 &initial_theta2 theta3 &initial_theta3 theta4 &initial_theta4

      var_e 0.25      var1 1.5      var2 0.5      cv -0.5;

bounds var_e >0, var1>0, var2>0;

if &t.= 0 then mu = theta1 +u1;

else mu = (theta4+u2) + ((theta1+u1)-(theta4+u2))/((1 + exp((theta3)*(log(&t.)-log(theta2))))));

model &y. ~ normal( mu , var_e); random u1 u2 ~ normal([0,0], [var1, cv, var2]) subject = &id. ;

run;

%mend plcvdtinit;

*****

Sample code to add risk factors into the model (replace bold by your information)

*****;

proc nlmixed data=dataset_name cov;

parms theta1 initial theta2 initial theta3 initial theta4 initial

      theta1_risk initial theta2_risk initial theta3_risk initial theta4_risk initial

      var_e initial var1 initial var2 initial cv initial;

bounds var_e >0, var1>0, var2>0;

if outcome= 0 then mu = theta1 +u1; else mu = (theta4+ theta4_risk*risk+u2) + ((theta1+ theta1_risk*risk+u1)-(theta4+

theta4_risk*risk+u2))/((1 + exp((theta3+ theta3_risk*risk)*(log(time)-log(theta2+ theta2_risk*risk+))))));

model outcome ~ normal( mu ,var_e);

random u1 u2 ~ normal([0,0], [var1, cv, var2]) subject = id ; run;

```

| Appendix B. Simulation results of sigmoid mixed modeling of 1000 randomly generated                                                        |                                        |       |       |       |       |
|--------------------------------------------------------------------------------------------------------------------------------------------|----------------------------------------|-------|-------|-------|-------|
| Variable                                                                                                                                   | Number of observations per participant |       |       |       |       |
|                                                                                                                                            | 5                                      | 7     | 10    | 20    | 30    |
| <b>Mean</b>                                                                                                                                |                                        |       |       |       |       |
| $\theta_1$                                                                                                                                 | -0.61                                  | -0.60 | -0.61 | -0.61 | -0.61 |
| $-\theta_2$                                                                                                                                | 1.83                                   | 1.83  | 1.83  | 1.83  | 1.83  |
| $\theta_3$                                                                                                                                 | 0.74                                   | 0.74  | 0.74  | 0.74  | 0.74  |
| $\theta_4$                                                                                                                                 | 0.53                                   | 0.53  | 0.53  | 0.53  | 0.53  |
| <b>Bias</b>                                                                                                                                |                                        |       |       |       |       |
| $\theta_1$                                                                                                                                 | 0.00                                   | 0.01  | 0.00  | 0.00  | 0.00  |
| $-\theta_2$                                                                                                                                | 0.00                                   | 0.01  | 0.01  | 0.00  | 0.01  |
| $\theta_3$                                                                                                                                 | 0.00                                   | 0.00  | 0.00  | 0.00  | 0.00  |
| $\theta_4$                                                                                                                                 | 0.00                                   | 0.00  | 0.00  | 0.00  | 0.00  |
| <b>MSE</b>                                                                                                                                 |                                        |       |       |       |       |
| $\theta_1$                                                                                                                                 | 0.03                                   | 0.03  | 0.03  | 0.03  | 0.03  |
| $\theta_2$                                                                                                                                 | 0.01                                   | 0.01  | 0.01  | 0.01  | 0.01  |
| $\theta_3$                                                                                                                                 | 0.00                                   | 0.00  | 0.00  | 0.00  | 0.00  |
| $\theta_4$                                                                                                                                 | 0.00                                   | 0.00  | 0.00  | 0.00  | 0.00  |
| <b>Cover</b>                                                                                                                               |                                        |       |       |       |       |
| $\theta_1$                                                                                                                                 | 0.95                                   | 0.94  | 0.95  | 0.95  | 0.94  |
| $\theta_2$                                                                                                                                 | 0.95                                   | 0.96  | 0.95  | 0.96  | 0.96  |
| $\theta_3$                                                                                                                                 | 0.95                                   | 0.95  | 0.95  | 0.94  | 0.94  |
| $\theta_4$                                                                                                                                 | 0.93                                   | 0.95  | 0.94  | 0.95  | 0.94  |
| n=100, $\theta_1 = -0.6111$ , $\theta_4 = 0.5293$ , $\theta_3 = 0.7418$ , $-\theta_2 = 1.8259$ , $\sigma_u = 1.7374$ , $\sigma_v = 0.1870$ |                                        |       |       |       |       |

Appendix C. A random sample of person-specific observed global cognition (outcome variable, in black) and observed BMI (in red), and predicted global cognition (in grey) from the sigmoidal model of the main analyses

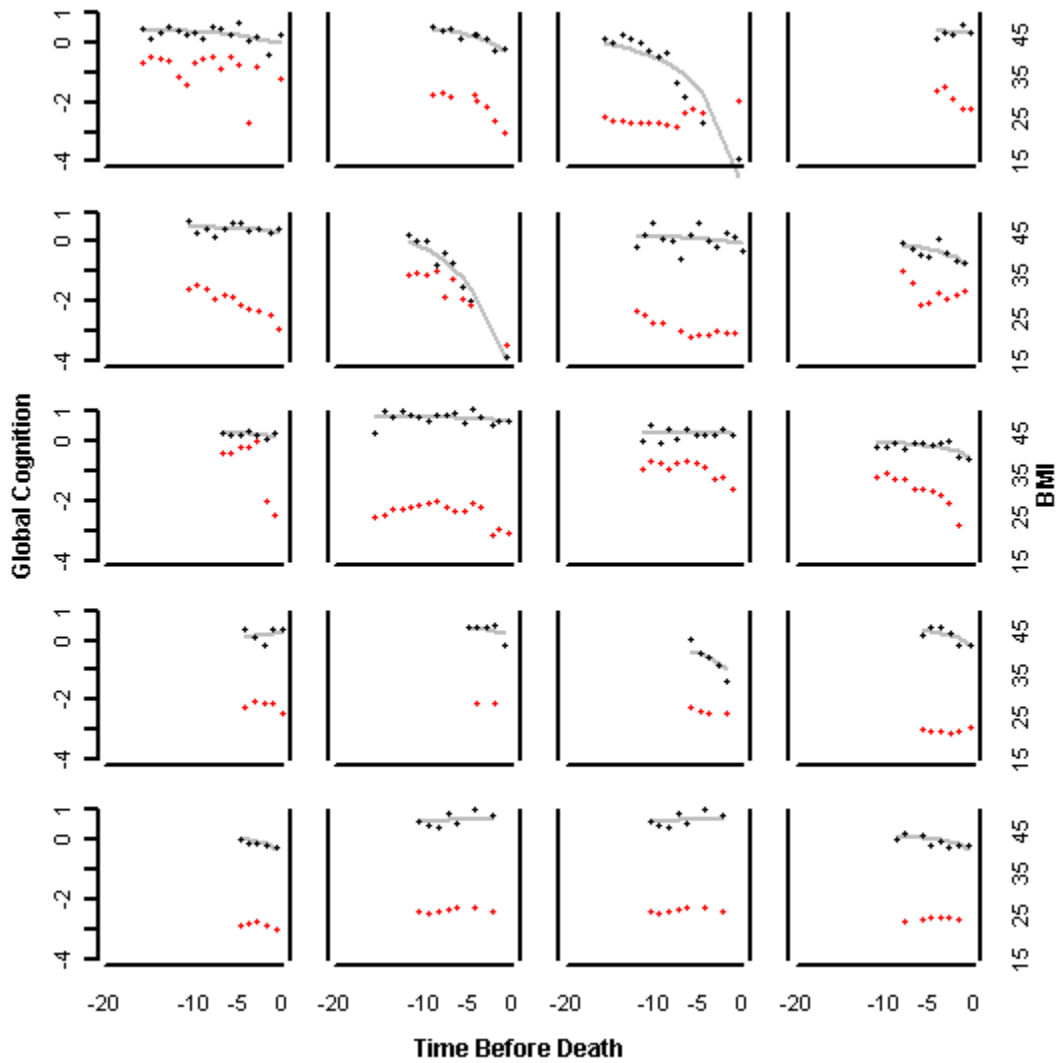

Supplement: NIHMS870822-supplement-Appendix.pdf [file NIHMS870822-supplement-Appendix.pdf]
